# Supplementary material for: Bat detective—Deep learning tools for bat acoustic signal detection
Source: PubMed Central journal article supplement (PMC5843167; doi:10.1371/journal.pcbi.1005995), 2018-03-08
Supplement: pcbi.1005995.s005.pdf [file pcbi.1005995.s005.pdf]

**S1 Table**

| <b>Test Dataset</b> | <b>iBats (Romania &amp; Bulgaria)</b> | <b>iBats (UK)</b>    | <b>Norfolk Bat Survey (Norfolk, UK)</b> |
|---------------------|---------------------------------------|----------------------|-----------------------------------------|
| Recording device    | Tranquility Transect                  | Tranquility Transect | SM2 Song Meter                          |
| Recording type      | TE, full spectrum                     | TE, full spectrum    | RT, full spectrum                       |
| Recording method    | Road transect                         | Road transect        | Stationary Point                        |
| No. of clips        | 500                                   | 434                  | 500                                     |
| Mean duration       | 3.84s                                 | 3.84s                | 400ms                                   |
| No. of bat calls    | 1604                                  | 842                  | 1345                                    |
