# Supplementary material for: Bat detective—Deep learning tools for bat acoustic signal detection
Source: PubMed Central journal article supplement (PMC5843167; doi:10.1371/journal.pcbi.1005995), 2018-03-08
Supplement: pcbi.1005995.s006.pdf [file pcbi.1005995.s006.pdf]

**S2 Table**

|                       | <b>Call Detections</b>          |          |                    | <b>Pass Detections</b>          |          |                    |
|-----------------------|---------------------------------|----------|--------------------|---------------------------------|----------|--------------------|
| <i>Fixed Effects</i>  | <b><math>\beta</math> (Std)</b> | <b>Z</b> | <b>p</b>           | <b><math>\beta</math> (Std)</b> | <b>Z</b> | <b>p</b>           |
| Intercept             | 4.31 (0.09)                     | 46.6     | <2e <sup>-16</sup> | 3.28 (0.08)                     | 41.9     | <2e <sup>-16</sup> |
| Analytical System     | 0.37 (0.11) <sup>***</sup>      | 34.4     | <2e <sup>-16</sup> | 0.06 (0.02)                     | 3.2      | 0.00143            |
| <i>Random Effects</i> | <b>Variance (Std)</b>           |          |                    | <b>Variance (Std)</b>           |          |                    |
| Sampling Event        | 0.195 (0.44)                    |          |                    | 0.108 (0.33)                    |          |                    |
| Transect              | 0.034 (0.18)                    |          |                    | 0.035 (0.18)                    |          |                    |
| Date                  | 0.036 (0.19)                    |          |                    | 0.018 (0.13)                    |          |                    |
